# Supplementary material
Source: Springer Nature journal article supplement (https://www.springermedizin.de/resource/supplementary/12889_2012_4741_MOESM3_ESM.pdf/9493824)
Supplement: MOESM3 [file 9493824]

**Table S2 Source of finances for households to cope with OOP payments**

| Independent variables                                        |                           | Percentage distribution of households according to source of finance [n (%)]* |                      |                                      |
|--------------------------------------------------------------|---------------------------|-------------------------------------------------------------------------------|----------------------|--------------------------------------|
|                                                              |                           | From savings                                                                  | From borrowing money | From selling or mortgaging of assets |
| <b>Income</b>                                                | 1 <sup>st</sup> quintile  | 449 (91.5)                                                                    | 41 (8.4)             | 4 (0.8)                              |
|                                                              | 2 <sup>nd</sup> quintile  | 457 (96)                                                                      | 23 (4.8)             | 2 (0.4)                              |
|                                                              | 3 <sup>rd</sup> quintile  | 487 (97)                                                                      | 15 (3)               | 1 (0.2)                              |
|                                                              | 4 <sup>th</sup> quintile  | 426 (97)                                                                      | 14 (3.2)             | 1 (0.2)                              |
|                                                              | 5 <sup>th</sup> quintile  | 621 (98.9)                                                                    | 9 (1.4)              | 0 (0)                                |
| <b>Type of the health services as place for consultation</b> | Government                | 484 (94)                                                                      | 29 (5.6)             | 4 (0.8)                              |
|                                                              | Private                   | 2001 (96.5)                                                                   | 80 (3.9)             | 5 (0.2)                              |
| <b>Levels of the health services</b>                         | Clinics/Health centers    | 1035 (97)                                                                     | 36 (3.4)             | 3 (0.3)                              |
|                                                              | Hospitals                 | 972 (96.7)                                                                    | 35 (3.5)             | 4 (0.4)                              |
|                                                              | Super-specialty hospitals | 478 (92.6)                                                                    | 38 (7.5)             | 2 (0.4)                              |
| <b>Overall</b>                                               |                           | 2494 (96)                                                                     | 109 (4.2)            | 9 (0.4)                              |

\*Total may cross 100% due to multiple responses (sources of finance) by single household.
